# Supplementary material for: Chemistry of Spontaneous Alkylation of Methimazole with 1,2-Dichloroethane
Source: MDPI journal article supplement (doi:10.3390/molecules26227032), 2021-11-21
Supplement: s1 [file s1]

## Supplementary Information:

## Chemistry of Spontaneous Alkylation of Methimazole with 1,2-Dichloroethane

Leo Štefan, Ana Čikoš, Robert Vianello, Ivica Đilović, Dubravka Matković-Čalogović and Miljenko Dumić

**Table S1.** Crystal data and structure refinement for **4a**, **4b**, **6** and **8**.

|                                          | <b>4a</b>                                                                   | <b>4b</b>                                                                    | <b>6</b>                                                                            | <b>8</b>                                                                     |
|------------------------------------------|-----------------------------------------------------------------------------|------------------------------------------------------------------------------|-------------------------------------------------------------------------------------|------------------------------------------------------------------------------|
| Molecular formula                        | [C <sub>6</sub> H <sub>9</sub> N <sub>2</sub> S]Cl                          | [C <sub>6</sub> H <sub>9</sub> N <sub>2</sub> S]BF <sub>4</sub>              | [(C <sub>6</sub> H <sub>9</sub> ClN <sub>2</sub> S) <sub>2</sub> Ag]BF <sub>4</sub> | C <sub>10</sub> H <sub>14</sub> N <sub>4</sub> S <sub>2</sub>                |
| Formula weight                           | 176.66                                                                      | 228.02                                                                       | 548.00                                                                              | 254.37                                                                       |
| Temperature/K                            | 293(2)                                                                      | 169.99(10)                                                                   | 169.99(10)                                                                          | 169.99(10)                                                                   |
| Crystal system                           | Orthorhombic                                                                | Monoclinic                                                                   | Monoclinic                                                                          | Monoclinic                                                                   |
| Space group                              | <i>Pnma</i>                                                                 | <i>P2<sub>1</sub>/c</i>                                                      | <i>P2<sub>1</sub>/c</i>                                                             | <i>P2<sub>1</sub>/c</i>                                                      |
| <i>a</i> /Å                              | 12.6091(7)                                                                  | 5.56720(10)                                                                  | 7.54590(10)                                                                         | 12.1442(5)                                                                   |
| <i>b</i> /Å                              | 6.5090(5)                                                                   | 17.1985(4)                                                                   | 13.5083(2)                                                                          | 6.9640(3)                                                                    |
| <i>c</i> /Å                              | 9.9212(5)                                                                   | 10.0040(2)                                                                   | 19.3375(3)                                                                          | 14.1111(6)                                                                   |
| $\alpha$ /°                              | 90                                                                          | 90                                                                           | 90                                                                                  | 90                                                                           |
| $\beta$ /°                               | 90                                                                          | 93.848(2)                                                                    | 93.3310(10)                                                                         | 93.260(4)                                                                    |
| $\gamma$ /°                              | 90                                                                          | 90                                                                           | 90                                                                                  | 90                                                                           |
| Volume/Å <sup>3</sup>                    | 814.26(9)                                                                   | 955.70(3)                                                                    | 1967.79(5)                                                                          | 1191.48(9)                                                                   |
| <i>Z</i>                                 | 4                                                                           | 4                                                                            | 4                                                                                   | 4                                                                            |
| $\rho_{\text{calc}}$ /g cm <sup>-3</sup> | 1.441                                                                       | 1.585                                                                        | 1.850                                                                               | 1.418                                                                        |
| $\mu$ /mm <sup>-1</sup>                  | 0.650                                                                       | 3.304                                                                        | 13.098                                                                              | 3.874                                                                        |
| <i>F</i> (000)                           | 368.0                                                                       | 464.0                                                                        | 1088.0                                                                              | 536.0                                                                        |
| Radiation                                | Mo K $\alpha$ ( $\lambda$ = 0.71073)                                        | Cu K $\alpha$ ( $\lambda$ = 1.54184 Å)                                       | Cu K $\alpha$ ( $\lambda$ = 1.54184)                                                | Cu K $\alpha$ ( $\lambda$ = 1.54184)                                         |
| 2 $\theta$ range for data collection/°   | 8.156 to 52.998                                                             | 10.246 to 132.79                                                             | 7.988 to 132.996                                                                    | 7.292 to 133.898                                                             |
| Index ranges                             | -15 ≤ <i>h</i> ≤ 15, -5 ≤ <i>k</i> ≤ 8, -11 ≤ <i>l</i> ≤ 12                 | -6 ≤ <i>h</i> ≤ 5, -20 ≤ <i>k</i> ≤ 20, -11 ≤ <i>l</i> ≤ 11                  | -8 ≤ <i>h</i> ≤ 8, -16 ≤ <i>k</i> ≤ 16, -22 ≤ <i>l</i> ≤ 20                         | -14 ≤ <i>h</i> ≤ 14, -5 ≤ <i>k</i> ≤ 8, -16 ≤ <i>l</i> ≤ 16                  |
| Reflections collected                    | 3050                                                                        | 10548                                                                        | 15351                                                                               | 8232                                                                         |
| Independent reflections                  | 914 [ <i>R</i> <sub>int</sub> = 0.0371, <i>R</i> <sub>sigma</sub> = 0.0350] | 1689 [ <i>R</i> <sub>int</sub> = 0.0595, <i>R</i> <sub>sigma</sub> = 0.0374] | 3450 [ <i>R</i> <sub>int</sub> = 0.0343, <i>R</i> <sub>sigma</sub> = 0.0281]        | 2117 [ <i>R</i> <sub>int</sub> = 0.0305, <i>R</i> <sub>sigma</sub> = 0.0260] |
| Data/restraints/parameters               | 914/0/62                                                                    | 1689/256/174                                                                 | 3450/0/237                                                                          | 2117/0/148                                                                   |

|                                                  |                                  |                                  |                                  |                                  |
|--------------------------------------------------|----------------------------------|----------------------------------|----------------------------------|----------------------------------|
| Goodness-of-fit on $F^2$                         | 1.083                            | 1.064                            | 1.084                            | 1.076                            |
| Final $R$ indexes [ $I \geq 2\sigma(I)$ ]        | $R_1 = 0.0333$ , $wR_2 = 0.0824$ | $R_1 = 0.0777$ , $wR_2 = 0.1856$ | $R_1 = 0.0247$ , $wR_2 = 0.0641$ | $R_1 = 0.0298$ , $wR_2 = 0.0803$ |
| Final $R$ indexes [all data]                     | $R_1 = 0.0391$ , $wR_2 = 0.0868$ | $R_1 = 0.0798$ , $wR_2 = 0.1872$ | $R_1 = 0.0262$ , $wR_2 = 0.0649$ | $R_1 = 0.0321$ , $wR_2 = 0.0823$ |
| Largest diff. peak/hole / e<br>$\text{\AA}^{-3}$ | 0.38/−0.32                       | 0.53/−0.42                       | 0.56/−0.71                       | 0.23/−0.25                       |
| CCDC                                             | 2105605                          | 2105606                          | 2105607                          | 2105608                          |
